# Supplementary material for: Improving electroluminescence efficiency and operational lifetime of multi-resonance emitters with bipolar host materials
Source: Royal Society of Chemistry journal article supplement (doi:10.1039/d5qm00029g), 2025-01-01
Supplement: d5qm00029g1.pdf [file d5qm00029g1.pdf]

## ***Electronic Supplementary Information (ESI)***

### **Materials and Instruments**

All the chemicals and reagents are purchased from commercial sources and used as received with vacuum sublimation purification. UV-vis absorption spectra are measured on a Shimadzu UV-2600 spectrophotometer. PL spectra are recorded on a Horiba Fluoromax-4 spectrofluorometer. PL quantum yields are measured using a Hamamatsu absolute PL quantum yield spectrometer C11347 Quantaaurus\_QY. Transient PL decay spectra are measured under vacuum atmosphere for the films, using FLS-1000 fluorescence lifetime measurement system. Cyclic voltammogram is performed in dichloromethane or dimethylformamide containing 0.1 M tetrabutylammonium hexafluorophosphate with the scan rate of 50 mV s<sup>-1</sup>, using a platinum wire as the auxiliary electrode, a glass carbon disk as the working electrode and Ag/Ag<sup>+</sup> as the reference electrode, standardized for the redox couple ferricenium/ferrocene (Fc/Fc<sup>+</sup>).

### **Device Fabrication and Measurement**

The glass substrates precoated with a 90-nm layer of indium tin oxide (ITO) with a sheet resistance of 15~20 Ω per square are successively cleaned in ultrasonic bath of acetone, isopropanol, detergent and deionized water, respectively, taking 10 minutes for each step. Then, the substrates are totally dried in a 70 °C oven. Before the fabrication processes, in order to improve the hole injection ability of ITO, the substrates are treated by O<sub>2</sub> plasma for 10 minutes. The vacuum-deposited OLEDs are fabricated under a pressure of < 1 × 10<sup>-5</sup> Pa in the Fangsheng OMV-FS450 vacuum deposition system. Organic materials, LiF and Al are deposited at rates of 1~2 A s<sup>-1</sup>, 0.1 A s<sup>-1</sup> and 4 A s<sup>-1</sup>, respectively. The effective emitting area of the devices is 9 mm<sup>2</sup>, determined by the overlap between anode and cathode. For monochromatic OLEDs, the luminance-voltage-current density characteristics and EL spectra are obtained via a Konica Minolta CS-200 Color and Luminance Meter and an Ocean Optics USB 2000+ spectrometer, along with a Keithley 2400 Source Meter. The external quantum efficiencies are estimated utilizing the normalized EL spectra and the current efficiencies of the devices, assuming that the devices are Lambertian emitters. All the characterizations are conducted at room temperature in ambient conditions without any encapsulation except the lifetime devices.

### **Carrier mobility measurement**

The SCLC property can be described via the Mott-Gurney equation (S1), and the carrier mobility ( $\mu$ ) of organic semiconductors can be calculated according to the Poole–Frenkel formula (S2), where the  $\varepsilon_0$  is the free-space permittivity ( $8.85 \times 10^{-14} \text{ C V}^{-1} \text{ cm}^{-1}$ ),  $\varepsilon_r$  is the relative dielectric constant (assumed to be 3.0 for organic semiconductors),  $E$  is the electric field,  $\mu_0$  is the zero-field mobility, and  $\gamma$  is the Poole-Frenkel factor and  $L$  is the thickness of the neat film of each molecule.<sup>1,2</sup>

$$J = \frac{9}{8} \varepsilon_0 \varepsilon_r \mu \frac{E^2}{L} = \frac{9}{8} \varepsilon_0 \varepsilon_r \frac{V^2}{L^3} \mu_0 \exp\left(0.891 \gamma \sqrt{\frac{V}{L}}\right) \quad (\text{S1})$$

$$\mu = \mu_0 \exp(\gamma \sqrt{E}) \quad (\text{S2})$$

By fitting the current density–voltage curves in SCLC region according to Equation (S1), the  $\mu_0$  and  $\gamma$  values are obtained, thus generating the field-dependent carrier mobility by equation (S2).

### Additional Spectra and Tables

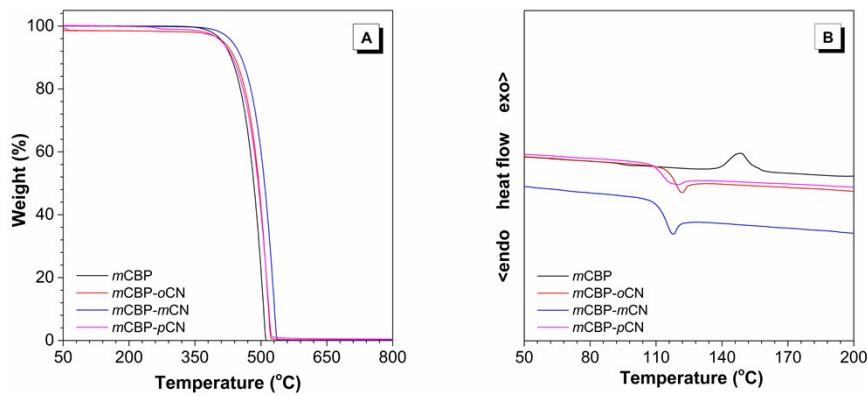

**Fig. S1** (A) Thermogravimetric analysis (TGA) and (B) differential scanning calorimeter (DSC) curve of *mCBP-oCN*, *mCBP-mCN*, *mCBP-pCN* and *mCBP*, measured under nitrogen at a scan rate of  $10 \text{ }^\circ\text{C s}^{-1}$ .

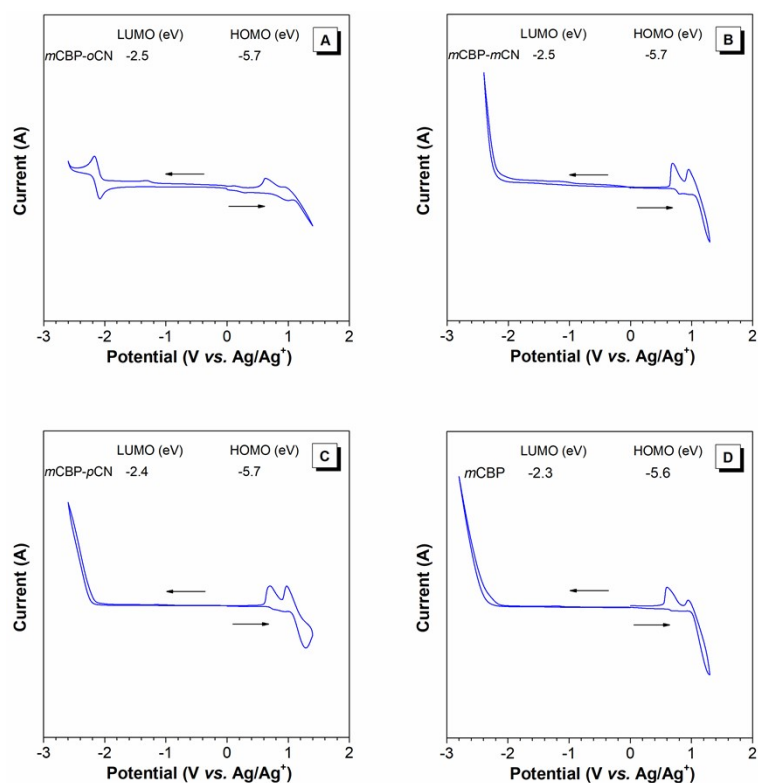

**Fig. S2** Cyclic voltammograms of (A) *mCBP-oCN*, (B) *mCBP-mCN*, (C) *mCBP-pCN* and (D) *mCBP*, measured in dichloromethane.

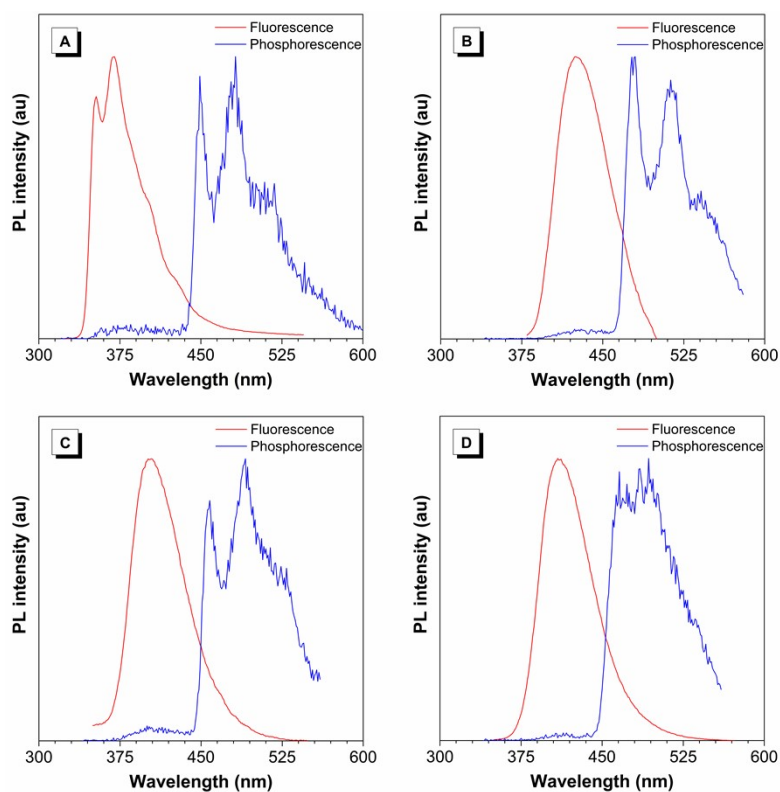

**Fig. S3** Fluorescence and phosphorescence spectra of the neat films of (A) *mCBP*, (B) *mCBP-oCN*, (C) *mCBP-mCN* and (D) *mCBP-pCN*, measured at 77 K.

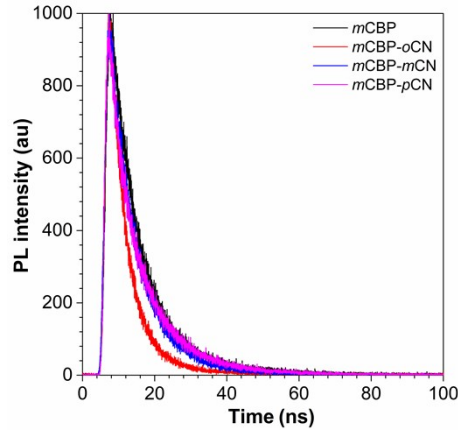

**Fig. S4** Transient PL decay spectra of the neat films of *mCBP*, *mCBP-oCN*, *mCBP-mCN*, and *mCBP-pCN*, measured at 298 K in the  $N_2$  atmosphere.

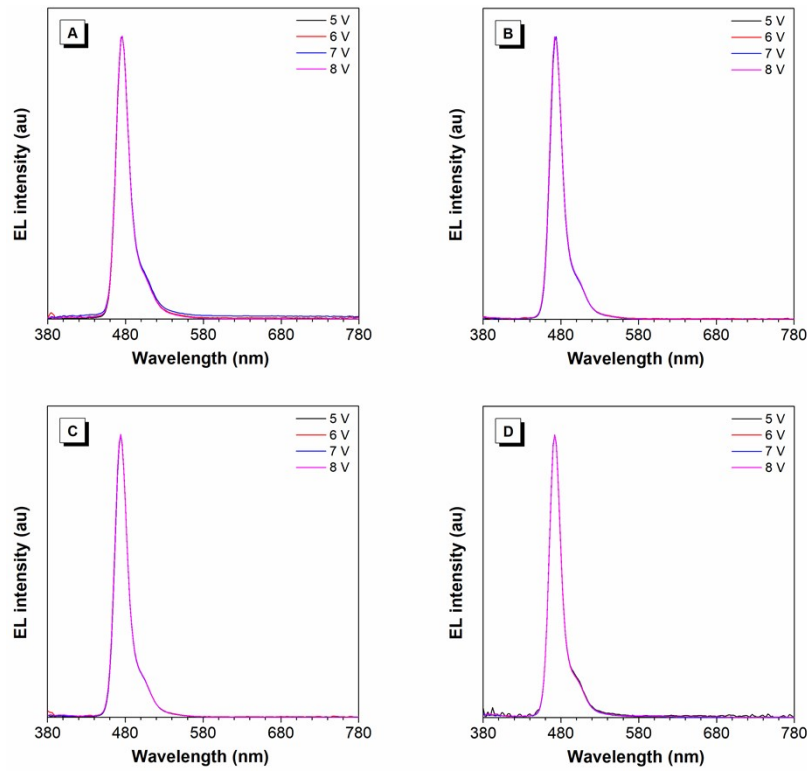

**Fig. S5** EL spectra of the devices based on 1 wt% *v*-DABNA doped in the hosts of (A) *mCBP-oCN*, (B) *mCBP-mCN*, (C) *mCBP-pCN* and (D) *mCBP* at different voltages.

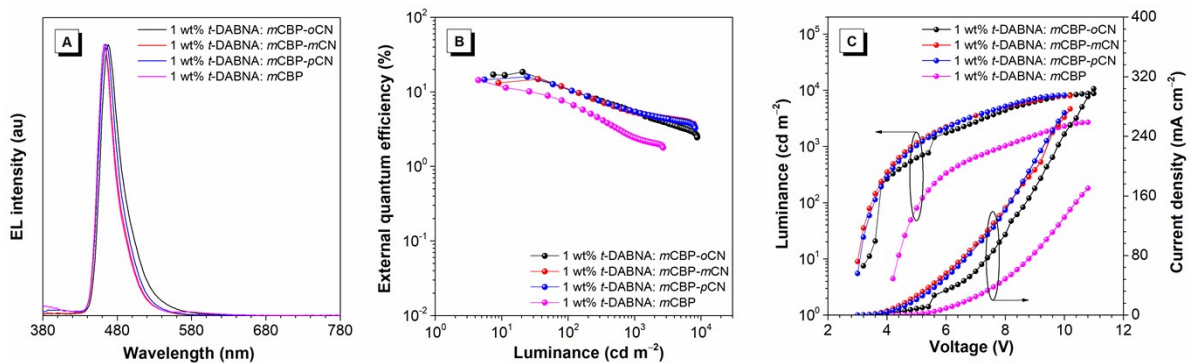

**Fig. S6** (A) EL spectra measured at 5 V, (B) external quantum efficiency curves with the change of luminance and (C) luminance and current density curves with the change of voltage of the devices with *t*-DABNA emitter.

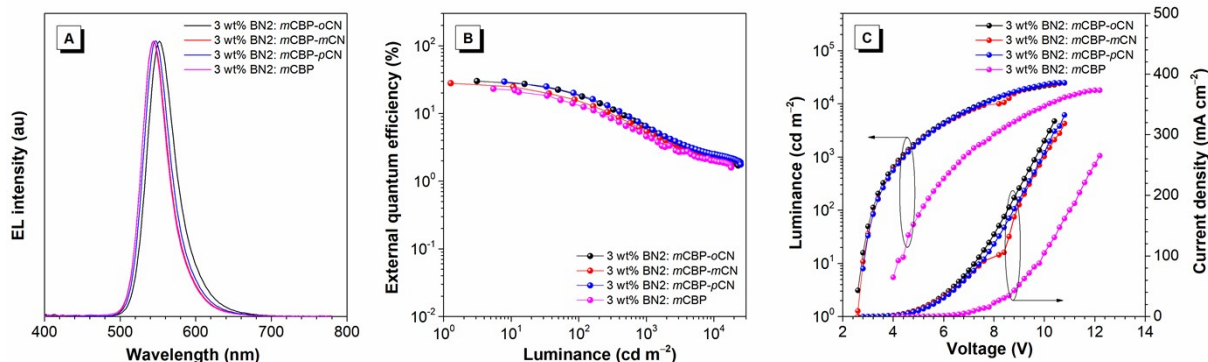

**Fig. S7** (A) EL spectra measured at 5 V, (B) external quantum efficiency curves with the change of luminance and (C) luminance and current density curves with the change of voltage of the devices with BN2 emitter.

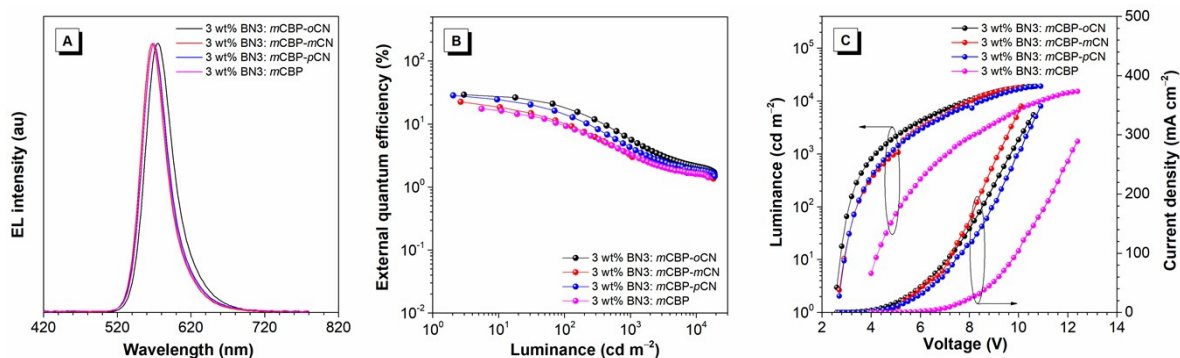

**Fig. S8** (A) EL spectra measured at 5 V, (B) external quantum efficiency curves with the change of luminance and (C) luminance and current density curves with the change of voltage of the devices with BN3 emitter.

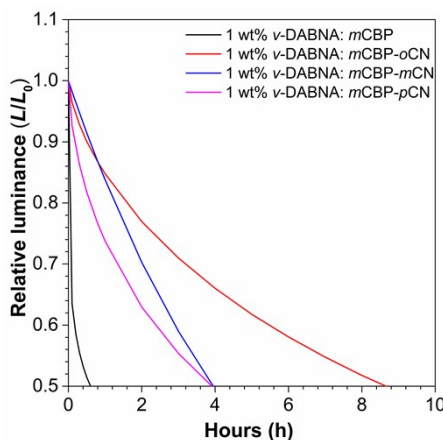

**Fig. S9** The operational lifetimes of the devices with *v*-DABNA emitter and different host materials.

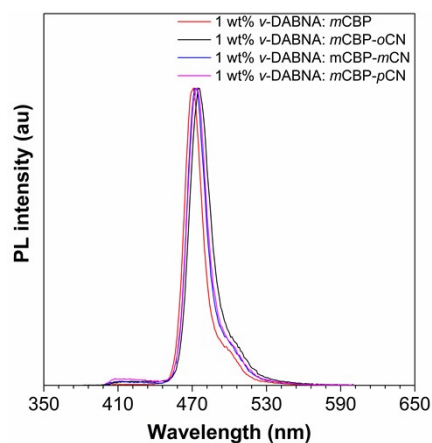

**Fig. S10** PL spectra of  $\nu$ -DABNA in different host materials.

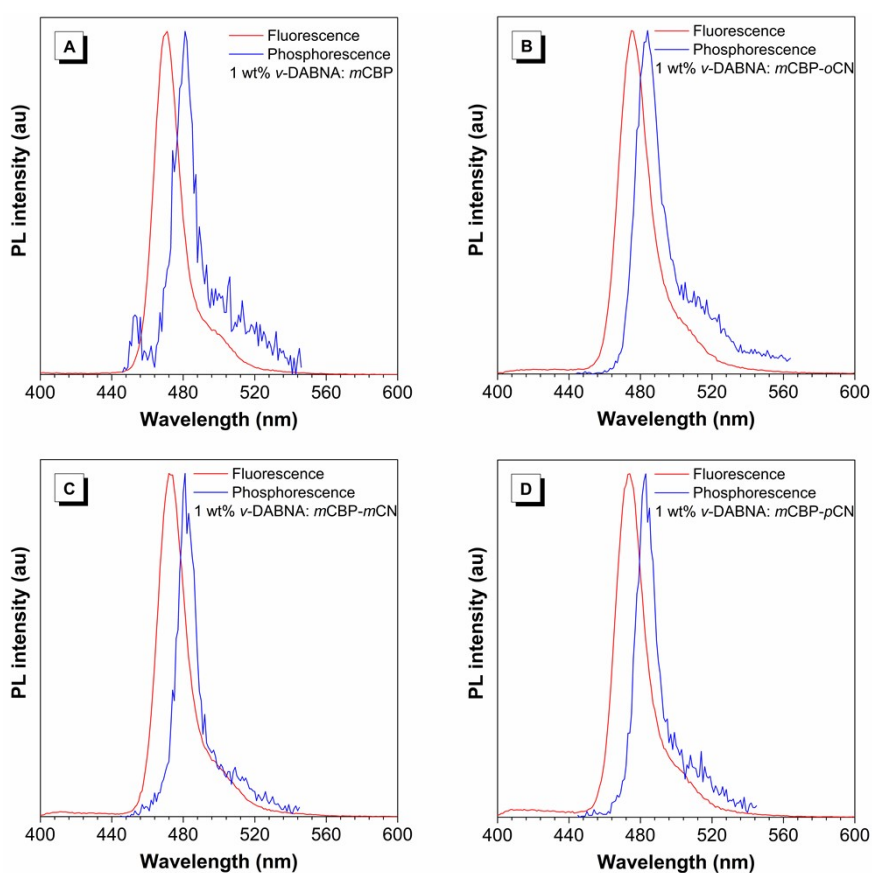

**Fig. S11** Fluorescence and phosphorescence spectra of  $\nu$ -DABNA in different host materials of (A) *mCBP*, (B) *mCBP-oCN*, (C) *mCBP-mCN* and (D) *mCBP-pCN*. Fluorescence spectra are measured at 298 K, and phosphorescence spectra are measured at 77 K.

**Table S1.** The EL performance of the OLEDs with *t*-DABNA emitter in different host materials.

| Host <sup>a)</sup>        | $\lambda_{\text{EL}}$ (nm) | $V_{\text{on}}$ (V) | $L_{\text{max}}$ (cd m <sup>-2</sup> ) | CE (cd A <sup>-1</sup> )                 | PE (lm W <sup>-1</sup> ) | EQE (%)  | CIE (x, y)     | FWHM (nm) |
|---------------------------|----------------------------|---------------------|----------------------------------------|------------------------------------------|--------------------------|----------|----------------|-----------|
|                           |                            |                     |                                        | maximum value/at 1000 cd m <sup>-2</sup> |                          |          |                |           |
| <i>m</i> CBP- <i>o</i> CN | 468                        | 3.1                 | 8754                                   | 21.7/6.8                                 | 18.5/5.6                 | 18.5/5.8 | (0.128, 0.156) | 28        |
| <i>m</i> CBP- <i>m</i> CN | 464                        | 2.9                 | 7962                                   | 12.7/4.6                                 | 12.4/3.0                 | 14.8/5.4 | (0.128, 0.099) | 27        |
| <i>m</i> CBP- <i>p</i> CN | 466                        | 2.9                 | 8176                                   | 14.7/5.0                                 | 14.4/3.1                 | 16.0/5.4 | (0.126, 0.111) | 28        |
| <i>m</i> CBP              | 462                        | 4.1                 | 2690                                   | 12.7/2.1                                 | 9.5/0.8                  | 14.4/2.4 | (0.149, 0.116) | 25        |

<sup>a)</sup> Abbreviations:  $V_{\text{on}}$  = turn-on voltage at 1 cd m<sup>-2</sup>;  $L_{\text{max}}$  = maximum luminance; CE/PE/EQE = current efficiency/power efficiency/external quantum efficiency at maximum value and 1000 cd m<sup>-2</sup>; CIE = Commission Internationale de l'Eclairage coordinates at 1000 cd m<sup>-2</sup>; FWHM = full-width at half-maximum. The doping concentration is 1 wt%.

**Table S2.** The EL performance of the OLEDs with BN2 emitter in different host materials.

| Host <sup>a)</sup>        | $\lambda_{\text{EL}}$ (nm) | $V_{\text{on}}$ (V) | $L_{\text{max}}$ (cd m <sup>-2</sup> ) | CE (cd A <sup>-1</sup> )                 | PE (lm W <sup>-1</sup> ) | EQE (%)  | CIE (x, y)     | FWHM (nm) |
|---------------------------|----------------------------|---------------------|----------------------------------------|------------------------------------------|--------------------------|----------|----------------|-----------|
|                           |                            |                     |                                        | maximum value/at 1000 cd m <sup>-2</sup> |                          |          |                |           |
| <i>m</i> CBP- <i>o</i> CN | 552                        | 2.5                 | 22900                                  | 125.6/24.2                               | 151.6/17.3               | 30.1/5.8 | (0.374, 0.613) | 43        |
| <i>m</i> CBP- <i>m</i> CN | 544                        | 2.5                 | 24543                                  | 119.4/23.3                               | 144.3/16.6               | 28.0/5.5 | (0.333, 0.650) | 40        |
| <i>m</i> CBP- <i>p</i> CN | 548                        | 2.7                 | 24938                                  | 125.9/27.9                               | 141.2/19.9               | 29.6/6.5 | (0.347, 0.638) | 42        |
| <i>m</i> CBP              | 544                        | 3.9                 | 18002                                  | 98.8/19.7                                | 77.6/9.1                 | 23.2/4.6 | (0.326, 0.652) | 40        |

<sup>a)</sup> Abbreviations:  $V_{\text{on}}$  = turn-on voltage at 1 cd m<sup>-2</sup>;  $L_{\text{max}}$  = maximum luminance; CE/PE/EQE = current efficiency/power efficiency/external quantum efficiency at maximum value and 1000 cd m<sup>-2</sup>; CIE = Commission Internationale de l'Eclairage coordinates at 1000 cd m<sup>-2</sup>; FWHM = full-width at half-maximum. The doping concentration is 3 wt%.

**Table S3.** The EL performance of the OLEDs with BN3 emitter in different host materials.

| Host <sup>a)</sup>        | $\lambda_{\text{EL}}$ (nm) | $V_{\text{on}}$ (V) | $L_{\text{max}}$ (cd m <sup>-2</sup> ) | CE (cd A <sup>-1</sup> )                 | PE (lm W <sup>-1</sup> ) | EQE (%)  | CIE (x, y)     | FWHM (nm) |
|---------------------------|----------------------------|---------------------|----------------------------------------|------------------------------------------|--------------------------|----------|----------------|-----------|
|                           |                            |                     |                                        | maximum value/at 1000 cd m <sup>-2</sup> |                          |          |                |           |
| <i>m</i> CBP- <i>o</i> CN | 574                        | 2.5                 | 18876                                  | 103.4/19.8                               | 125.0/14.8               | 29.3/5.6 | (0.496, 0.500) | 43        |
| <i>m</i> CBP- <i>m</i> CN | 568                        | 2.6                 | 18189                                  | 86.4/12.7                                | 100.6/8.1                | 22.5/3.3 | (0.454, 0.541) | 40        |
| <i>m</i> CBP- <i>p</i> CN | 570                        | 2.6                 | 19081                                  | 105.7/16.0                               | 123.0/10.7               | 28.6/4.3 | (0.467, 0.529) | 41        |
| <i>m</i> CBP              | 570                        | 3.9                 | 15324                                  | 65.2/12.7                                | 51.2/5.7                 | 17.5/3.4 | (0.464, 0.532) | 39        |

<sup>a)</sup> Abbreviations:  $V_{\text{on}}$  = turn-on voltage at 1 cd m<sup>-2</sup>;  $L_{\text{max}}$  = maximum luminance; CE/PE/EQE = current efficiency/power efficiency/external quantum efficiency at maximum value and 1000 cd m<sup>-2</sup>; CIE = Commission Internationale de l'Eclairage coordinates at 1000 cd m<sup>-2</sup>; FWHM = full-width at half-maximum. The doping concentration is 3 wt%.

**Table S4.** Structures of films I–IV.

| film | structure                                     |
|------|-----------------------------------------------|
| I    | 1 wt% $\nu$ -DABNA: <i>m</i> CBP- <i>o</i> CN |
| II   | 1 wt% $\nu$ -DABNA: <i>m</i> CBP- <i>m</i> CN |
| III  | 1 wt% $\nu$ -DABNA: <i>m</i> CBP- <i>p</i> CN |
| IV   | 1 wt% $\nu$ -DABNA: <i>m</i> CBP              |

**Table S5.** Photophysical properties of  $\nu$ -DABNA in doped films with different hosts.

| Host <sup>a)</sup>        | $\lambda_{\text{PL}}$ (nm) | $\Delta E_{\text{ST}}$ (meV) | $\Phi_{\text{PL}}$ (%) | $\Theta_{//}$ (%) |
|---------------------------|----------------------------|------------------------------|------------------------|-------------------|
| <i>m</i> CBP- <i>o</i> CN | 476                        | 47                           | 84                     | 89.0              |
| <i>m</i> CBP- <i>m</i> CN | 472                        | 49                           | 80                     | 89.5              |
| <i>m</i> CBP- <i>p</i> CN | 474                        | 49                           | 82                     | 92.5              |
| <i>m</i> CBP              | 470                        | 60                           | 61                     | 86.0              |

<sup>a)</sup> Abbreviations:  $\lambda_{\text{PL}}$  = photoluminescence peak;  $\Delta E_{\text{ST}}$  = energy splitting between  $S_1$  and  $T_1$  states;  $\Phi_{\text{PL}}$  = photoluminescence quantum yield;  $\Theta_{//}$  = horizontal dipole ratio.

## Reference

- 1 G. Lin, H. Peng, L. Chen, H. Nie, W. Luo, Y. Li, S. Chen, R. Hu, A. Qin, Z. Zhao and B. Z. Tang, *ACS Appl. Mater. Interfaces*, 2016, **8**, 16799.
- 2 C. Liu, T. Li, M. Sun, M. Xie, Y. Zhou, W. Feng, Q. Sun, S.-T. Zhang, S. Xue and W. Yang, *Adv. Funct. Mater.*, 2023, **33**, 2215066.
